# Supplementary material for: The Kenya rift revisited: insights into lithospheric strength through data-driven 3-D gravity and thermal modelling
Source: Copernicus journal article supplement (doi:10.5194/se-8-45-2017), 2017-01-16
Supplement: Supplementary file 1 [file se-8-45-2017-supplement.zip]

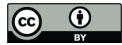

## *Supplement of*

# **The Kenya rift revisited: insights into lithospheric strength through data-driven 3-D gravity and thermal modelling**

**Judith Sippel et al.**

*Correspondence to:* Judith Sippel (sippel@gfz-potsdam.de)

- se-8-45-2017-supplement-title-page.pdf
- sippel\_et\_al\_tab\_S1.dat

The copyright of individual parts of the supplement might differ from the CC-BY 3.0 licence.
